# Supplementary material for: Predictors of High Resource Consumption in Alcohol Intoxicated Patients in the Emergency Department
Source: PubMed Central journal article supplement (PMC7312041; doi:10.3390/ijerph17114122), 2020-06-09
Supplement: ijerph-17-04122-s001.pdf [file ijerph-17-04122-s001.pdf]

**Table S1.** Clinical characteristics according to type of resource consumption.

| <b>Characteristic</b>               | <b>Total<br/>(<i>n</i> = 2586)</b> | <b>High<br/>(<i>n</i> = 646)</b> | <b>Low/Normal (<i>n</i> = 1940)</b> | <b><i>p</i></b> |
|-------------------------------------|------------------------------------|----------------------------------|-------------------------------------|-----------------|
| Circumstances, <i>n</i> (%)         |                                    |                                  |                                     |                 |
| Suicidal intent                     | 256 (9.9)                          | 38 (5.9)                         | 218 (11.2)                          | <0.001          |
| Aggressive                          | 157 (6.1)                          | 40 (6.2)                         | 117 (6.0)                           | 0.882           |
| GCS ≤ 9                             | 171 (6.6)                          | 75 (11.6)                        | 96 (4.9)                            | <0.001          |
| Accompanying injuries, <i>n</i> (%) |                                    |                                  |                                     |                 |
| Fracture                            | 253 (9.8)                          | 160 (24.8)                       | 93 (4.8)                            | <0.001          |
| Traumatic brain injury              | 190 (7.3)                          | 125 (19.3)                       | 65 (3.4)                            | <0.001          |
| Cerebral bleeding                   | 58 (2.2)                           | 39 (6.0)                         | 19 (1.0)                            | <0.001          |
| Dislocation                         | 29 (1.1)                           | 18 (2.8)                         | 11 (0.6)                            | <0.001          |
| Contusion                           | 162 (6.3)                          | 88 (13.6)                        | 74 (3.8)                            | <0.001          |
| Flesh wound                         | 355 (13.7)                         | 178 (27.6)                       | 177 (9.1)                           | <0.001          |
| Abrasion wound                      | 433 (16.7)                         | 219 (33.9)                       | 214 (11.0)                          | <0.001          |
| Other trauma                        | 41 (1.6)                           | 7 (1.1)                          | 34 (1.8)                            | 0.238           |
| Procedure, <i>n</i> (%)             |                                    |                                  |                                     |                 |
| Police attendance                   | 558 (21.6)                         | 131 (20.3)                       | 427 (22.0)                          | 0.354           |
| Emergency surgery                   | 139 (5.4)                          | 70 (10.8)                        | 69 (3.6)                            | <0.001          |
| Intubation needed                   | 44 (1.7)                           | 28 (4.3)                         | 16 (0.8)                            | <0.001          |

Abbreviation: GCS: Glasgow coma scale.
